# INFOGRAPHICS IN ANESTHESIOLOGY

Complex Information for Anesthesiologists Presented Quickly and Clearly

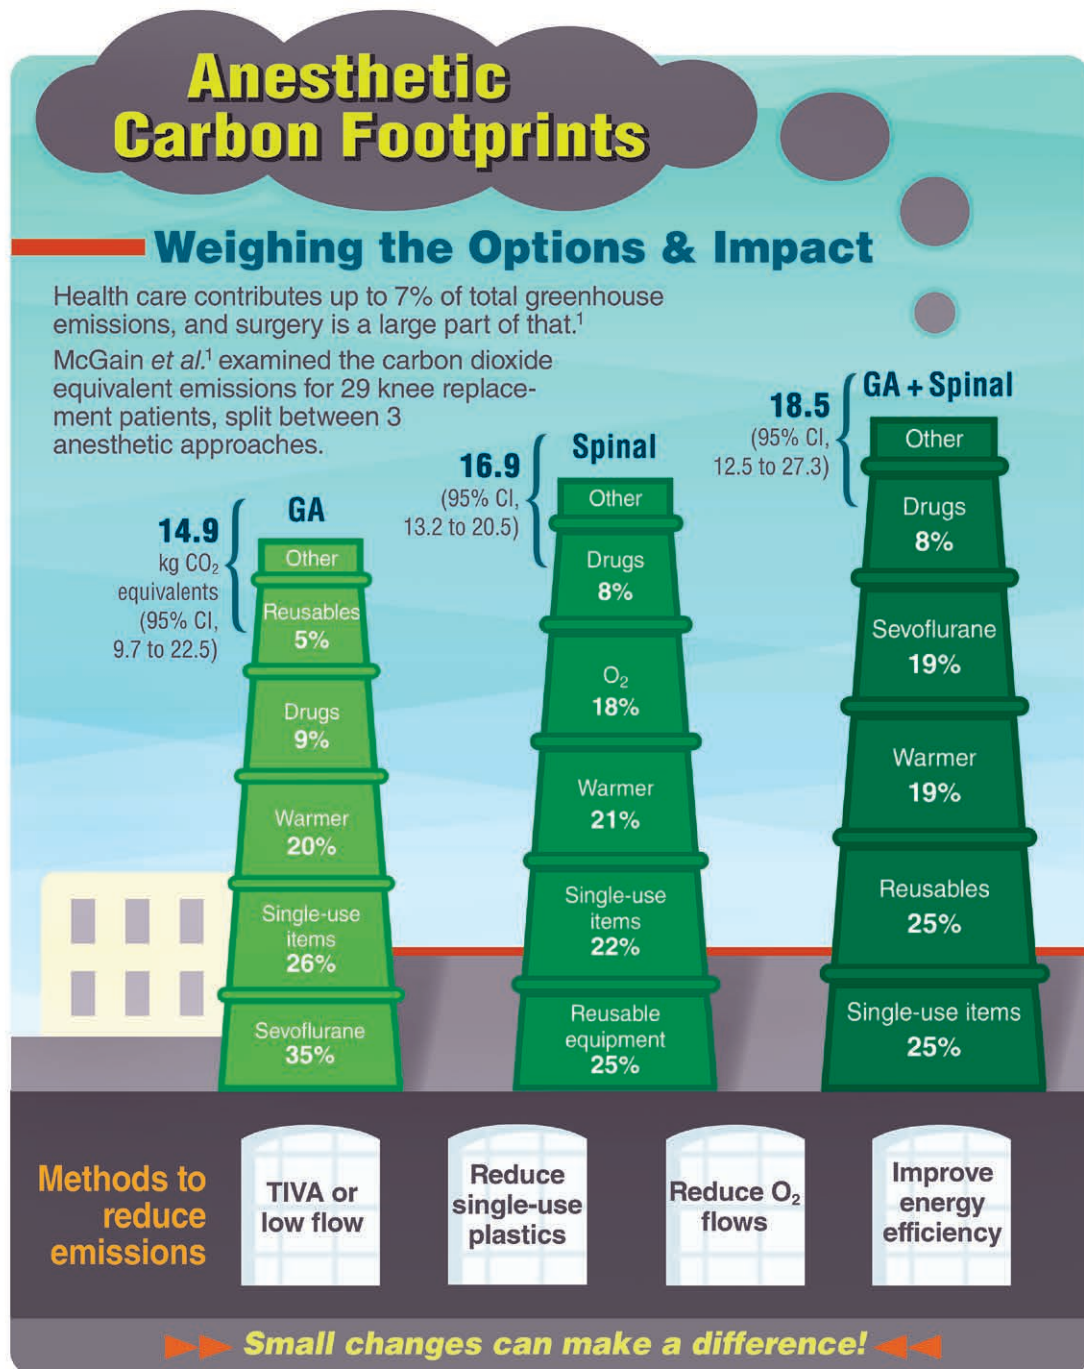

GA, general anesthesia; TIVA, total intravenous anesthetic.

Infographic created by Jonathan P. Wanderer, Vanderbilt University Medical Center, and James P. Rathmell, Brigham and Women's Health Care/Harvard Medical School. Illustration by Annemarie Johnson, Vivo Visuals Studio. Address correspondence to Dr. Wanderer: jon.wanderer@vumc.org.

1. McGain F, Sheridan N, Wickramarachchi K, Yates S, Chan B, McAlister S: Carbon footprint of general, regional, and combined anesthesia for total knee replacements. *ANESTHESIOLOGY* 2021; 135:976–91
